# Supplementary material
Source: PubMed Central journal article supplement (PMC6658762)
Supplement: AAC.00516-19-s0001.pdf [file AAC.00516-19-s0001.pdf]

**Supplementary Figures 1. Time-kill studies of SMIT-351 and SPAR-8497 strains.**

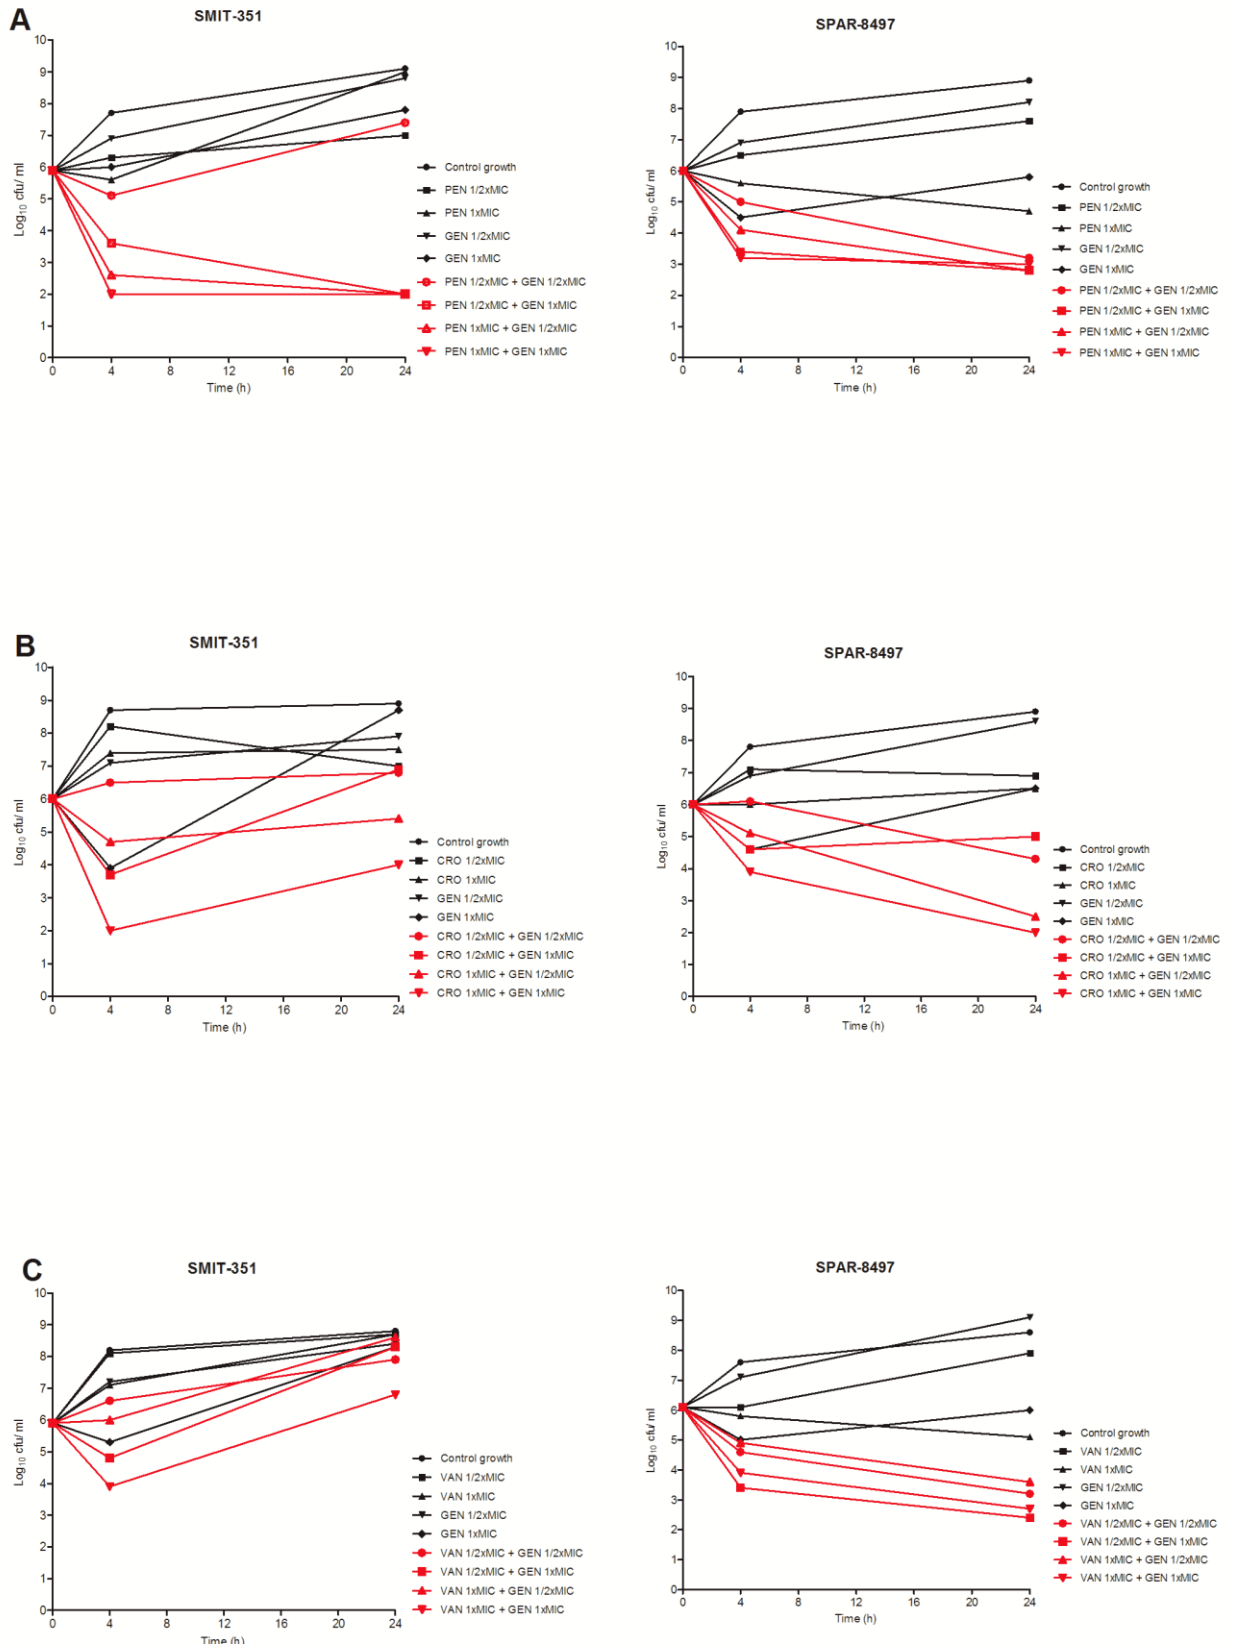

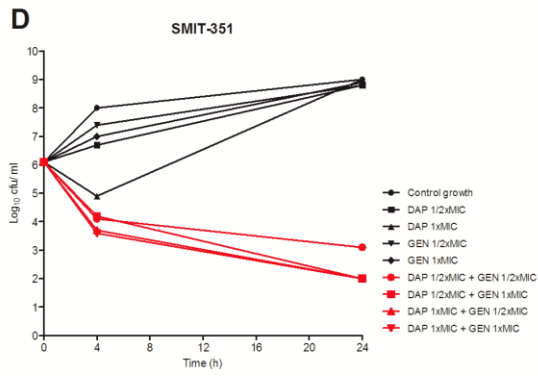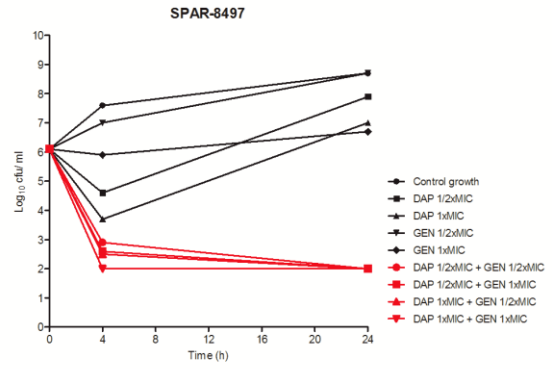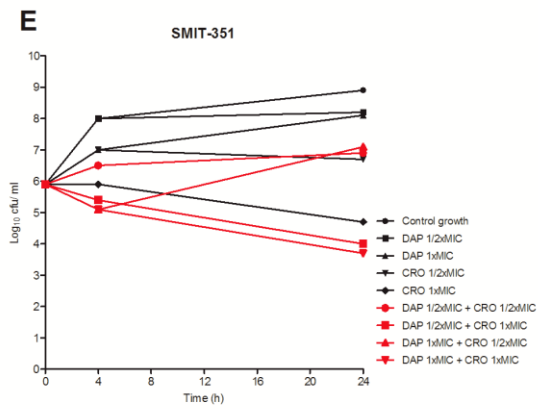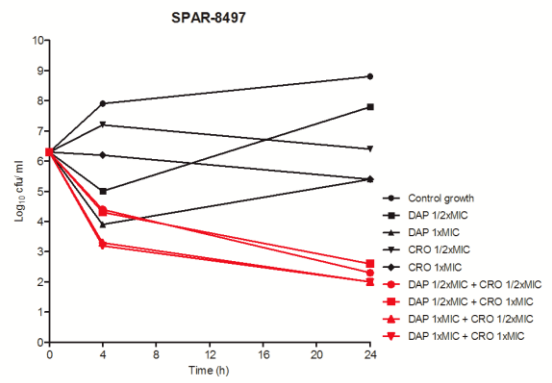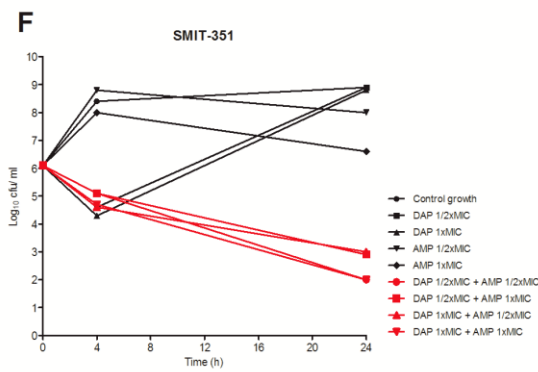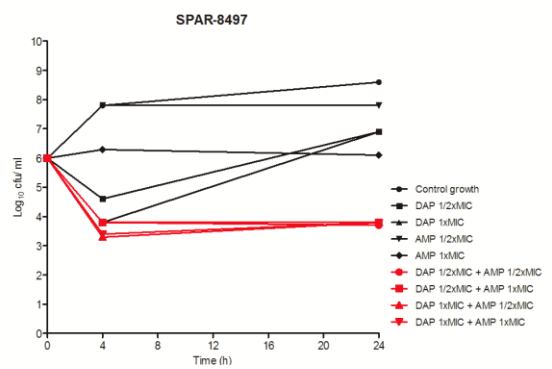

The concentrations of antibiotics used ranged from 1 x MIC to 0.5 x MIC depending on the MBC value. Inoculum was equal to 10<sup>6</sup> CFU/ml. Synergy was defined as a 2-log<sub>10</sub> decrease in the number of CFU/ml between the test with the combination and the test with the most active agent alone after 24 h incubation and bactericidal activity was defined as at least a 3-log<sub>10</sub> reduction in CFU from the initial inoculum at 24 h incubation.

A, penicillin (PEN) combined with gentamicin (GEN) curves; B, ceftriaxone (CRO) combined with GEN curves; C, vancomycin (VAN) combined with GEN curves; D, Daptomycin (DAP) combined with GEN curves; E, DAP combined with CRO curves and F, DAP combined with ampicillin (AMP) curves.
